# Supplementary material for: A Metabolomic Profile of Seminal Fluid in Extremely Severe Oligozoopermia Suggesting an Epididymal Involvement
Source: MDPI journal article supplement (doi:10.3390/metabo12121266), 2022-12-15
Supplement: s1 [file s1]

# Supplementary tables:

Table S1: Characteristics of participants. The non-parametric Mann-Whitney test or the parametric t-test was used for quantitative variables and the chi-squared ( $\chi^2$ ) test for qualitative variables with GraphPad Prism, v.8.0 (GraphPad Software, San Diego, CA, USA). Differences were considered significant at p-value < 0.05.

|                                            |                       | Control group<br>n = 20 | EO group<br>n = 19 | V group<br>n = 22 | p-value                                              |
|--------------------------------------------|-----------------------|-------------------------|--------------------|-------------------|------------------------------------------------------|
| Age (years)                                |                       | 35.6 ± 6.4              | 33.5 ± 6.4         | 41.8 ± 6.4        | C vs EO : 0.32<br>C vs V : 0.003<br>EO vs V : 0.0002 |
| Smoking status                             | Non smoker            | 7                       | 13                 | 0                 | C vs EO : 0.1                                        |
|                                            | Smoker                | 7                       | 4                  | 0                 |                                                      |
|                                            | Information missing   | 6                       | 2                  | 22                |                                                      |
| Sperm concentration (10 <sup>6</sup> / ml) |                       | 383 ± 220.3             | 0.3 ± 0.3          | 0 ± 0             | The 3 groups < 0.0001                                |
| Genetic                                    | Klinefelter           | 0                       | 2                  | 0                 | C vs EO : 0.18                                       |
|                                            | AZF deletion          | 0                       | 1                  | 0                 |                                                      |
|                                            | None                  | 20                      | 16                 | 0                 |                                                      |
|                                            | Information missing   | 0                       | 0                  | 22                |                                                      |
| Urological history                         | Cryptorchidism        | 0                       | 6                  | 0                 | C vs EO < 0.0001                                     |
|                                            | Hypospadias           | 0                       | 1                  | 0                 |                                                      |
|                                            | Testicular hypotrophy | 0                       | 13                 | 0                 |                                                      |
|                                            | Other                 | 0                       | 3                  | 0                 |                                                      |
|                                            | None                  | 20                      | 6                  | 0                 |                                                      |
|                                            | Information missing   | 0                       | 0                  | 22                |                                                      |

Table S3: The relevant metabolites characterizing the multivariate signature of the three groups compared two by two. Molecules were sorted by decreasing VIP value. For each metabolite, the table shows the family, the  $p(\text{corr})$  value, and the VIP value.

| C versus V (increased or decreased in V) |                      |                       |              | EO versus V (increased or decreased in EO) |                      |                       |              | EO versus C (increased or decreased in EO) |                 |                       |              |
|------------------------------------------|----------------------|-----------------------|--------------|--------------------------------------------|----------------------|-----------------------|--------------|--------------------------------------------|-----------------|-----------------------|--------------|
| Identification                           |                      | Multivariate analysis |              | Identification                             |                      | Multivariate analysis |              | Identification                             |                 | Multivariate analysis |              |
| Molecules                                | Family               | P(corr)<br>value      | VIP<br>value | Molecules                                  | Family               | P(corr)<br>value      | VIP<br>value | Molecules                                  | Family          | P(corr)<br>value      | VIP<br>value |
| SM C18:1                                 | Sphingolipids        | -0.899                | 1.656        | SM (OH) C22:1                              | Sphingolipids        | -0.795                | 1.825        | Lysine                                     | Amino acids     | -0.825                | 1.707        |
| SM (OH) C22:1                            | Sphingolipids        | -0.840                | 1.518        | SM C24:1                                   | Sphingolipids        | -0.739                | 1.749        | Aspartate                                  | Amino acids     | -0.822                | 1.694        |
| SM C16:1                                 | Sphingolipids        | -0.800                | 1.492        | SM (OH) C24:1                              | Sphingolipids        | -0.747                | 1.742        | Arginine                                   | Amino acids     | -0.831                | 1.678        |
| Lysine                                   | Amino acids          | -0.811                | 1.487        | PC aa C36:1                                | Glycerophospholipids | -0.731                | 1.738        | Glutamate                                  | Amino acids     | -0.804                | 1.653        |
| PC aa C32:0                              | Glycerophospholipids | -0.787                | 1.485        | SM C24:0                                   | Sphingolipids        | -0.745                | 1.707        | Glycine                                    | Amino acids     | -0.792                | 1.651        |
| Aspartate                                | Amino acids          | -0.787                | 1.463        | SM (OH) C22:2                              | Sphingolipids        | -0.690                | 1.652        | Ac-Ornithine                               | Biogenic amines | -0.785                | 1.634        |
| SM (OH) C22:2                            | Sphingolipids        | -0.797                | 1.449        | PC aa C32:0                                | Glycerophospholipids | -0.660                | 1.616        | Threonine                                  | Amino acids     | -0.789                | 1.624        |

|              |                      |        |           |                  |                      |        |           |                   |                      |        |           |
|--------------|----------------------|--------|-----------|------------------|----------------------|--------|-----------|-------------------|----------------------|--------|-----------|
| Glutamate    | Amino acids          | -0.778 | 1.43<br>4 | SM<br>C26:1      | Sphingolipids        | -0.695 | 1.61<br>0 | Serine            | Amino acids          | -0.778 | 1.62<br>1 |
| PC aa C38:6  | Glycerophospholipids | -0.736 | 1.43<br>1 | C0               | Acylcarnitines       | -0.694 | 1.59<br>7 | PC aa<br>C38:6    | Glycerophospholipids | -0.773 | 1.59<br>5 |
| SM C18:0     | Sphingolipids        | -0.700 | 1.37<br>6 | SM<br>C18:0      | Sphingolipids        | -0.624 | 1.54<br>8 | Alanine           | Amino acids          | -0.710 | 1.54<br>4 |
| Ac-Ornithine | Biogenic amines      | -0.721 | 1.35<br>1 | SM (OH)<br>C16:1 | Sphingolipids        | -0.606 | 1.53<br>4 | Methionine        | Amino acids          | -0.665 | 1.50<br>4 |
| Glycine      | Amino acids          | -0.708 | 1.34<br>2 | SM<br>C18:1      | Sphingolipids        | -0.606 | 1.48<br>2 | Asparagine        | Amino acids          | -0.717 | 1.48<br>4 |
| Arginine     | Amino acids          | -0.728 | 1.33<br>9 | PC ae<br>C36:1   | Glycerophospholipids | -0.557 | 1.46<br>8 | Glutamine         | Amino acids          | -0.684 | 1.47<br>5 |
| Alanine      | Amino acids          | -0.693 | 1.32<br>9 | PC aa<br>C30:0   | Glycerophospholipids | -0.547 | 1.43<br>7 | PC aa<br>C40:6    | Glycerophospholipids | -0.706 | 1.46<br>4 |
| PC aa C40:6  | Glycerophospholipids | -0.657 | 1.32<br>9 | PC aa<br>C38:3   | Glycerophospholipids | -0.548 | 1.42<br>5 | Tryptophan        | Amino acids          | -0.641 | 1.45<br>5 |
| PC ae C40:6  | Glycerophospholipids | -0.694 | 1.30<br>0 | SM<br>C16:1      | Sphingolipids        | -0.532 | 1.36<br>2 | PC ae<br>C40:6    | Glycerophospholipids | -0.670 | 1.42<br>2 |
| C5:1         | Acylcarnitines       | -0.693 | 1.29<br>2 | PC ae<br>C34:0   | Glycerophospholipids | -0.519 | 1.35<br>4 | Proline           | Amino acids          | -0.634 | 1.37<br>0 |
| Proline      | Amino acids          | -0.681 | 1.29<br>2 | PC ae<br>C34:1   | Glycerophospholipids | -0.479 | 1.34<br>9 | lysoPC a<br>C16:1 | Glycerophospholipids | 0.646  | 1.36<br>7 |
| PC aa C38:3  | Glycerophospholipids | -0.638 | 1.28<br>8 | PC ae<br>C32:1   | Glycerophospholipids | -0.529 | 1.31<br>4 | PC aa<br>C36:1    | Glycerophospholipids | 0.659  | 1.35<br>1 |

|                  |                      |        |           |                   |                      |        |           |                   |                      |        |           |
|------------------|----------------------|--------|-----------|-------------------|----------------------|--------|-----------|-------------------|----------------------|--------|-----------|
| SM C24:0         | Sphingolipids        | -0.711 | 1.28<br>3 | PC aa<br>C40:4    | Glycerophospholipids | -0.530 | 1.28<br>6 | PC ae<br>C38:6    | Glycerophospholipids | -0.660 | 1.34<br>6 |
| SM (OH)<br>C16:1 | Sphingolipids        | -0.623 | 1.26<br>9 | SM<br>C16:0       | Sphingolipids        | -0.433 | 1.26<br>0 | Histidine         | Amino acids          | -0.591 | 1.33<br>4 |
| Methionine       | Amino acids          | -0.626 | 1.26<br>2 | PC aa<br>C38:4    | Glycerophospholipids | -0.478 | 1.24<br>6 | SM C24:1          | Sphingolipids        | 0.660  | 1.33<br>4 |
| C0               | Acylcarnitines       | -0.691 | 1.26<br>1 | SM (OH)<br>C14:1  | Sphingolipids        | -0.399 | 1.19<br>7 | lysoPC a<br>C18:1 | Glycerophospholipids | 0.576  | 1.33<br>1 |
| PC ae C38:6      | Glycerophospholipids | -0.608 | 1.24<br>7 | SM<br>C26:0       | Sphingolipids        | -0.512 | 1.18<br>4 | lysoPC a<br>C17:0 | Glycerophospholipids | 0.548  | 1.31<br>6 |
| Asparagine       | Amino acids          | -0.674 | 1.24<br>4 | PC aa<br>C36:2    | Glycerophospholipids | -0.354 | 1.18<br>0 | C5:1              | Acylcarnitines       | -0.615 | 1.31<br>2 |
| PC aa C36:1      | Glycerophospholipids | -0.631 | 1.24<br>2 | lysoPC a<br>C18:2 | Glycerophospholipids | -0.470 | 1.16<br>9 | lysoPC a<br>C16:0 | Glycerophospholipids | 0.528  | 1.29<br>7 |
| Tryptophan       | Amino acids          | -0.608 | 1.23<br>8 | PC aa<br>C36:4    | Glycerophospholipids | -0.414 | 1.16<br>4 | PC aa<br>C34:1    | Glycerophospholipids | 0.506  | 1.28<br>1 |
| PC aa C36:6      | Glycerophospholipids | -0.643 | 1.23<br>1 | PC aa<br>C34:1    | Glycerophospholipids | -0.346 | 1.15<br>8 | lysoPC a<br>C18:0 | Glycerophospholipids | 0.499  | 1.27<br>9 |
| Tyrosine         | Amino acids          | -0.618 | 1.21<br>6 | Ac-<br>Ornithine  | Biogenic amines      | 0.366  | 1.15<br>7 | PC aa<br>C36:6    | Glycerophospholipids | -0.620 | 1.27<br>9 |
| PC aa C42:4      | Glycerophospholipids | -0.659 | 1.21<br>2 | Isoleucine        | Amino acids          | 0.324  | 1.12<br>4 | SM C18:1          | Sphingolipids        | -0.553 | 1.27<br>7 |
| SM C26:1         | Sphingolipids        | -0.646 | 1.20<br>8 | PC aa<br>C36:3    | Glycerophospholipids | -0.350 | 1.10<br>6 | Leucine           | Amino acids          | -0.518 | 1.26<br>4 |

|               |                      |        |       |                |                      |        |       |               |                      |        |       |
|---------------|----------------------|--------|-------|----------------|----------------------|--------|-------|---------------|----------------------|--------|-------|
| PC aa C40:5   | Glycerophospholipids | -0.604 | 1.201 | PC aa C38:6    | Glycerophospholipids | -0.433 | 1.100 | PC ae C36:1   | Glycerophospholipids | 0.533  | 1.244 |
| PC aa C30:0   | Glycerophospholipids | -0.538 | 1.183 | PC aa C34:2    | Glycerophospholipids | -0.260 | 1.070 | alpha-AAA     | Biogenic amines      | -0.591 | 1.214 |
| PC aa C38:5   | Glycerophospholipids | -0.553 | 1.166 | PC ae C40:2    | Glycerophospholipids | -0.410 | 1.065 | PC aa C28:1   | Glycerophospholipids | 0.468  | 1.207 |
| PC aa C36:3   | Glycerophospholipids | -0.512 | 1.164 | PC ae C34:2    | Glycerophospholipids | -0.304 | 1.052 | PC ae C34:0   | Glycerophospholipids | 0.458  | 1.196 |
| PC aa C40:3   | Glycerophospholipids | -0.625 | 1.162 | Leucine        | Amino acids          | 0.256  | 1.052 | SM C16:0      | Sphingolipids        | 0.437  | 1.179 |
| PC aa C38:4   | Glycerophospholipids | -0.518 | 1.158 | lysoPC a C16:1 | Glycerophospholipids | -0.339 | 1.050 | PC aa C36:3   | Glycerophospholipids | -0.484 | 1.120 |
| Serine        | Amino acids          | -0.574 | 1.153 | Glutamine      | Amino acids          | 0.253  | 1.048 | PC aa C38:3   | Glycerophospholipids | -0.495 | 1.115 |
| Threonine     | Amino acids          | -0.596 | 1.151 | PC aa C28:1    | Glycerophospholipids | -0.289 | 1.042 | PC aa C40:5   | Glycerophospholipids | -0.481 | 1.113 |
| PC aa C40:4   | Glycerophospholipids | -0.590 | 1.140 | SM C20:2       | Sphingolipids        | -0.387 | 1.033 | PC aa C38:5   | Glycerophospholipids | -0.459 | 1.113 |
| Ornithine     | Amino acids          | -0.610 | 1.140 | Serine         | Amino acids          | 0.234  | 1.021 | SM (OH) C14:1 | Sphingolipids        | 0.354  | 1.107 |
| SM (OH) C24:1 | Sphingolipids        | -0.613 | 1.136 | C5-DC (C6-OH)  | Acylcarnitines       | 0.354  | 1.006 | SM C24:0      | Sphingolipids        | 0.481  | 1.056 |
| PC aa C34:2   | Glycerophospholipids | -0.518 | 1.136 |                |                      |        |       | PC aa C36:2   | Glycerophospholipids | 0.265  | 1.041 |

|                |                      |        |           |
|----------------|----------------------|--------|-----------|
| Histidine      | Amino acids          | -0.567 | 1.13<br>1 |
| Spermidine     | Biogenic amines      | -0.556 | 1.11<br>3 |
| SM C24:1       | Sphingolipids        | -0.575 | 1.07<br>3 |
| lysoPC a C18:1 | Glycerophospholipids | 0.333  | 1.07<br>0 |
| lysoPC a C16:0 | Glycerophospholipids | 0.346  | 1.05<br>3 |
| PC ae C32:1    | Glycerophospholipids | -0.512 | 1.04<br>9 |
| SM (OH) C14:1  | Sphingolipids        | -0.368 | 1.04<br>4 |
| PC aa C36:4    | Glycerophospholipids | -0.421 | 1.04<br>0 |
| PC aa C36:2    | Glycerophospholipids | -0.354 | 1.03<br>5 |
| PC ae C34:1    | Glycerophospholipids | -0.467 | 1.02<br>6 |
| SM C26:0       | Sphingolipids        | -0.563 | 1.02<br>3 |
| Valine         | Amino acids          | -0.433 | 1.02<br>0 |

|               |                      |        |           |
|---------------|----------------------|--------|-----------|
| PC aa C30:0   | Glycerophospholipids | 0.342  | 1.02<br>5 |
| SM (OH) C16:1 | Sphingolipids        | 0.328  | 1.02<br>4 |
| Valine        | Amino acids          | -0.358 | 1.02<br>1 |
| Isoleucine    | Amino acids          | -0.375 | 1.01<br>3 |

|                |                      |       |       |
|----------------|----------------------|-------|-------|
| lysoPC a C18:0 | Glycerophospholipids | 0.245 | 1.004 |
|----------------|----------------------|-------|-------|

Table S4: Metabolites of the Venn diagram

|                      | Common to all three comparisons | C versus (V-EO)                                                       | V versus (C-EO) | EO versus (C-V)   | C versus V    | EO versus V   | EO versus C    |
|----------------------|---------------------------------|-----------------------------------------------------------------------|-----------------|-------------------|---------------|---------------|----------------|
| Class of metabolites | 13 metabolites                  | 23 metabolites                                                        | 15 metabolites  | 9 metabolites     | 5 metabolites | 5 metabolites | 2 metabolites  |
| Amino acids          | Ser                             | Lys Met<br>Asp Asn<br>Glu Trp<br>Gly Thr<br>Arg His<br>Ala Val<br>Pro |                 | Gln<br>Ile<br>Leu | Orn<br>Tyr    |               |                |
| Biogenic amines      | Ac-Orn                          |                                                                       |                 |                   | Spermidine    |               | alpha-AAA      |
| Acylcarnitines       |                                 | C5:1                                                                  | C0              |                   |               | C5-DC (C6-OH) |                |
| Glycerophospholipids | PC aa C30:0                     | PC aa C36:6                                                           | PC aa C32:0     | PC aa C28:1       | PC aa C40:3   | PC ae C34:2   | lysoPC a C17:0 |

|                |                                                                         |                                                                                                                                   |                                                                                                 |                                                                 |             |                                   |  |
|----------------|-------------------------------------------------------------------------|-----------------------------------------------------------------------------------------------------------------------------------|-------------------------------------------------------------------------------------------------|-----------------------------------------------------------------|-------------|-----------------------------------|--|
|                | PC aa C36:1<br>PC aa C36:2<br>PC aa C36:3<br>PC aa C38:3<br>PC aa C38:6 | PC aa C40:5<br>PC aa C38:5<br>PC ae C38:6<br>PC aa C40:6<br>PC ae C40:6<br><br>lysoPC a C18:1<br>lysoPC a C16:0<br>lysoPC a C18:0 | PC aa C34:2<br>PC aa C36:4<br>PC aa C38:4<br>PC aa C40:4<br>PC ae C32:1<br>PC ae C34:1          | PC aa C34:1<br>PC ae C34:0<br>PC ae C36:1<br><br>lysoPC a C16:1 | PC aa C42:4 | PC ae C40:2<br><br>lysoPC a C18:2 |  |
| Sphingomyelins | SM (OH) C14:1<br>SM (OH) C16:1<br>SM C18:1<br>SM C24:0<br>SM C24:1      |                                                                                                                                   | SM (OH) C22:1<br>SM (OH) C22:2<br>SM (OH) C24:1<br>SM C16:1<br>SM C18:0<br>SM C26:0<br>SM C26:1 | SM C16:0                                                        |             | SM C20:2                          |  |
